# Supplementary material for: Imprinted MoS2 achieve highly efficient self-separative molecule extraction
Source: Royal Society of Chemistry journal article supplement (doi:10.1039/c8ta01854e), 2018-01-01
Supplement: c8ta01854e2.pdf [file c8ta01854e2.pdf]

## Supplementary Information

### Imprinted MoS<sub>2</sub> achieving high-efficient self-separative molecule extraction

Qizhang Huang,<sup>a,c</sup> Peili Chen,<sup>a</sup> Yueyun Fang,<sup>a,c</sup> Pengyi Liu,<sup>b</sup> Jifu Shi<sup>\*a,b</sup> and Gang  
Xu<sup>\*a,d</sup>

<sup>a</sup>Guangzhou Institute of Energy Conversion, Key Laboratory of Renewable Energy, Guangdong  
Provincial Key Laboratory of New and Renewable Energy Research and Development, Chinese  
Academy of Sciences, Guangzhou 510640, China

E-mail: [shijifu2017@126.com](mailto:shijifu2017@126.com); [xugang@ms.giec.ac.cn](mailto:xugang@ms.giec.ac.cn)

<sup>b</sup>Siyuan Laboratory, Department of Physics, Jinan University, Guangzhou 510632, Guangdong,  
China

<sup>c</sup>University of Chinese Academy of Sciences, Beijing 100049, China

<sup>d</sup>Tibet New Energy Research and Demonstration Centre, Lhasa, Tibet 850000, China

### Supplementary Information S1:

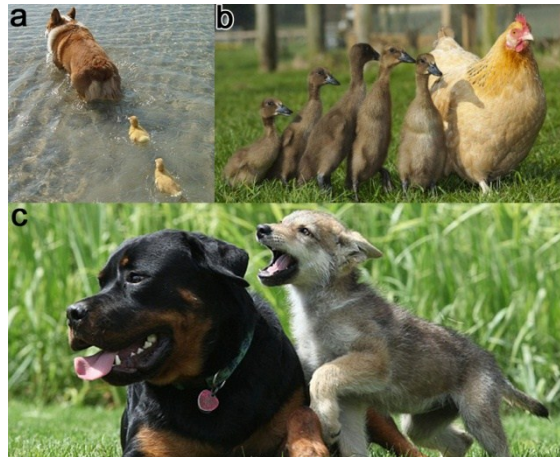

**Figure S1.** Imprinting in animals: a) ducklings on Corgi,<sup>w1</sup> b) new-hatched ducks on hen,<sup>w2</sup> and c) wolf cub on Rottweiler.<sup>w3</sup>

Log in the websites below for more detailed information about imprinting in animals:

w1. **Ducklings on Corgi:** <http://www.thatcutesite.com/two-ducklings-imprint-on-a-corgi/>

w2. **Wolf cub on Rottweiler:** <http://www.dailymail.co.uk/news/article-1192276/Barking-true-The-touching-bond-Rottweiler-wolf-cub.html>

w3. **New-hatched ducks on hen:**  
<https://www.deathandtaxesmag.com/181417/hilda-the-hen-sits-on-the-wrong-nest-hatches-crazy-cute-baby-ducks/>

### Supplementary Information S2:

Sips model which shares both attributes of Langmuir and Freundlich models is defined as follow:

$$q_e = \frac{q_m K_s C_e^{n_s}}{1 + K_s C_e^{n_s}} \quad (1)$$

Here,  $q_m$  is the maximum adsorption capacity,  $q_e$  is the equilibrium adsorption capacity,  $C_e$  is the equilibrium concentration,  $K_s$  is the Sips isotherm constant related to the energy of adsorption, and  $n_s$  is the sorbent surface heterogeneity parameter. If the value of  $n_s$  is unity, the Sips model describes the typical Langmuir adsorption behavior, otherwise the Sips model reflects a complex multilayer adsorption ( $n_s$  not equal to unity). Optionally, as the value of  $C_e$  or  $K_s$  approaches zero, the Sips isotherm describes Freundlich isotherm behavior.

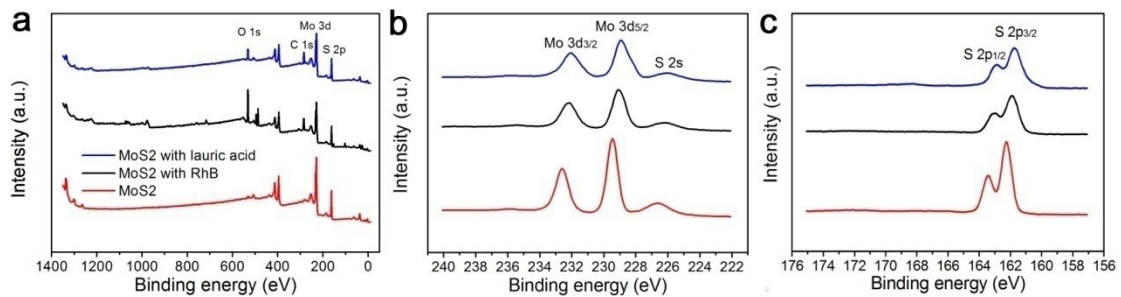

**Figure S2.** Xps spectra of pristine MoS<sub>2</sub> (red line), MoS<sub>2</sub> with adsorbed RhB (black line), and MoS<sub>2</sub> with adsorbed LA (blue line): a) Element scanning, b) Mo 3d, and c) S 2p.

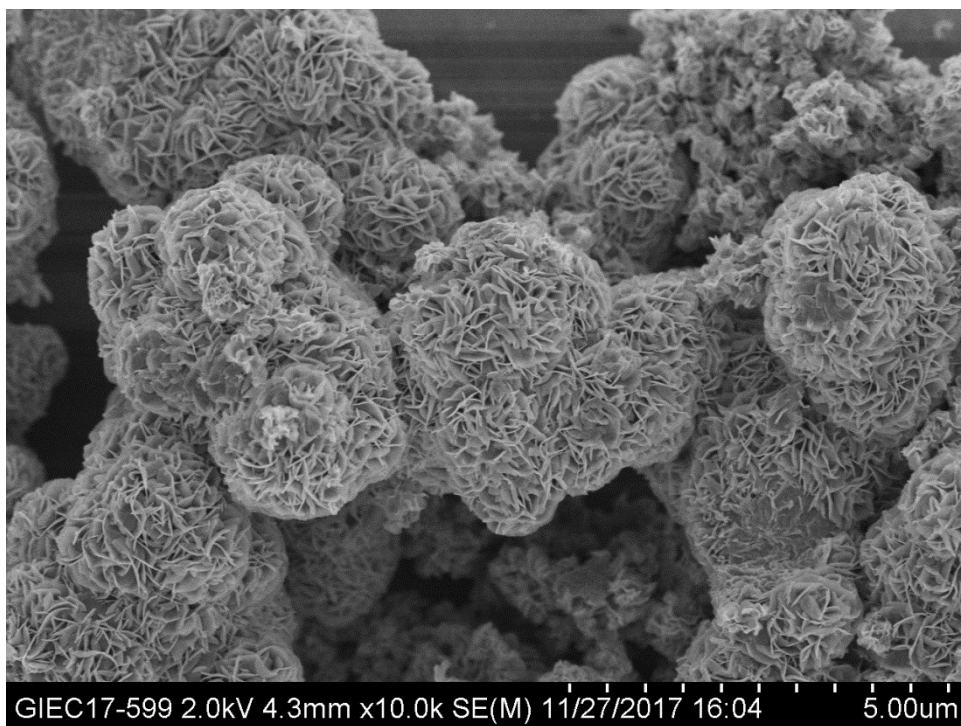

**Figure S3.** SEM image of as-prepared flower-like MoS<sub>2</sub>.

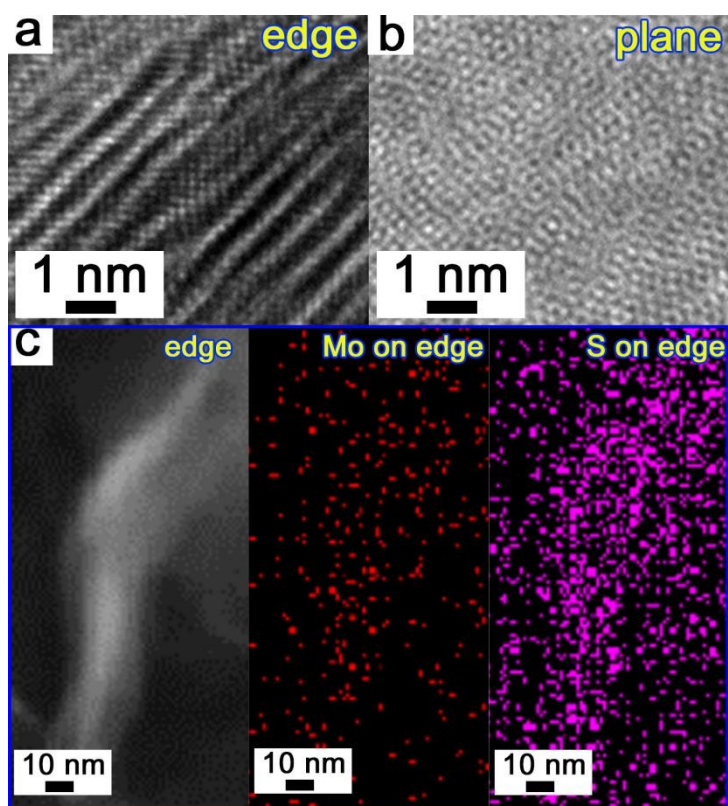

**Figure S4.** HRTEM of the (a) edge and (b) plane of MoS<sub>2</sub> nanosheet, and (c) Mo and S element mapping on MoS<sub>2</sub> edge.

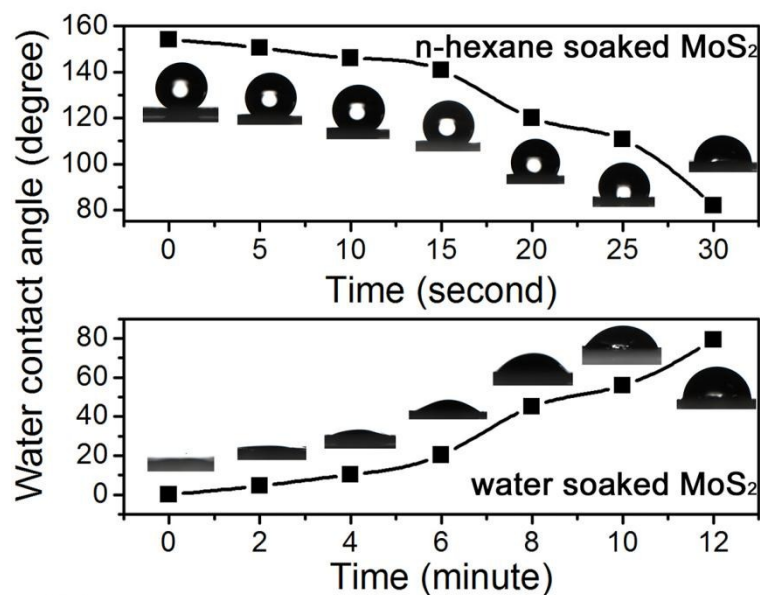

**Figure S5.** Water contact angle (WCA) test of n-hexane- (top graph) and water-imprinted MoS<sub>2</sub> (bottom graph) versus time.

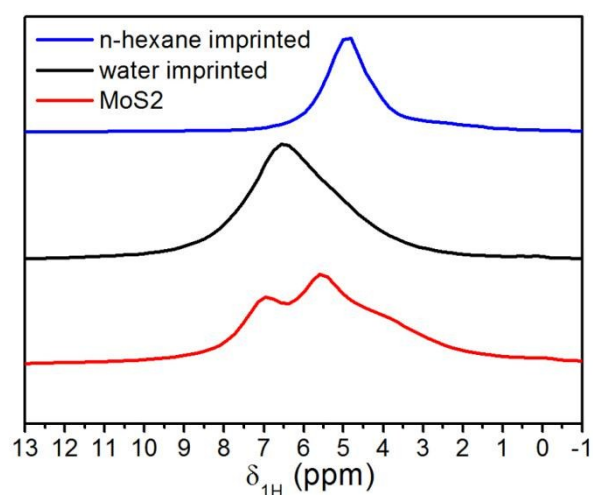

**Figure S6.** <sup>1</sup>H solid-state MAS NMR spectra of pristine, water- and n-hexane-imprinted MoS<sub>2</sub>.

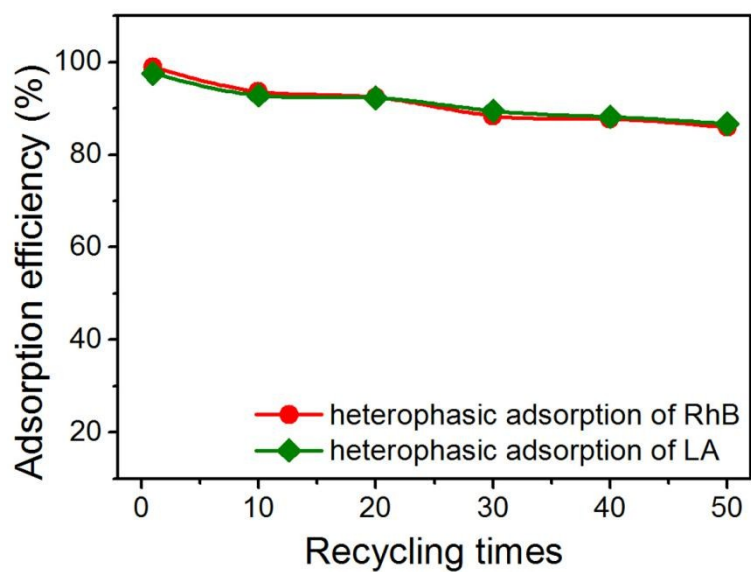

**Figure S7.** Recycling ability of imprinted  $\text{MoS}_2$  for heterophasic adsorption.

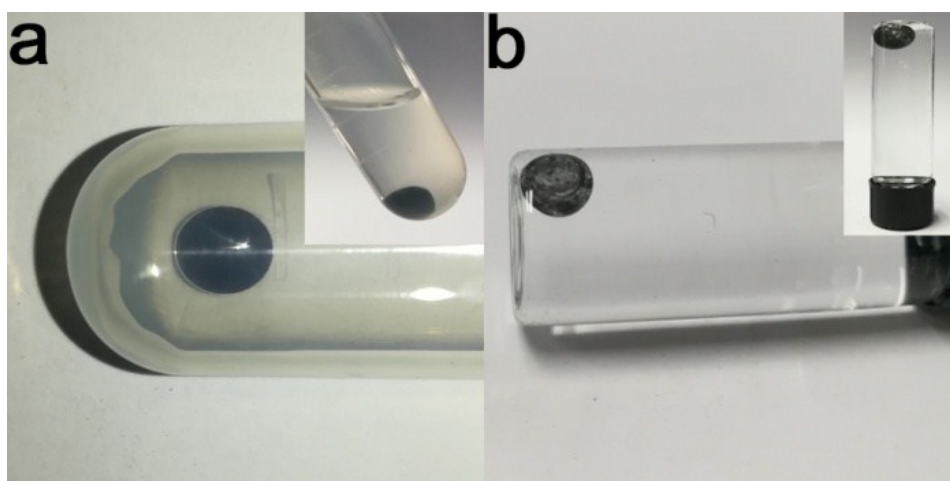

**Figure S8.** Imprinted  $\text{MoS}_2$  d) wrapped by water droplet submerged in n-hexane and e) wrapped by n-hexane droplet submerged in water.

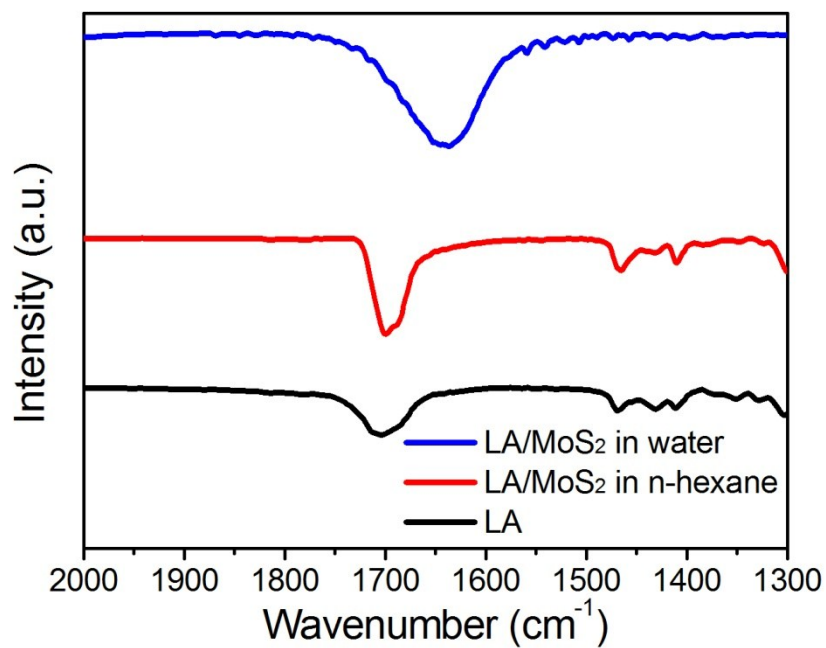

**Figure S9.** Fourier transformed infrared spectra (FTIR) of lauric acid (LA), LA adsorbed by MoS<sub>2</sub> in monophase (both MoS<sub>2</sub> and LA in n-hexane) and heterophase (MoS<sub>2</sub> in water but LA in n-hexane).

Figure S10 indicates that MoS<sub>2</sub> soaked by water and n-hexane have no change in its flower-like morphology, compared with as-prepared MoS<sub>2</sub>.

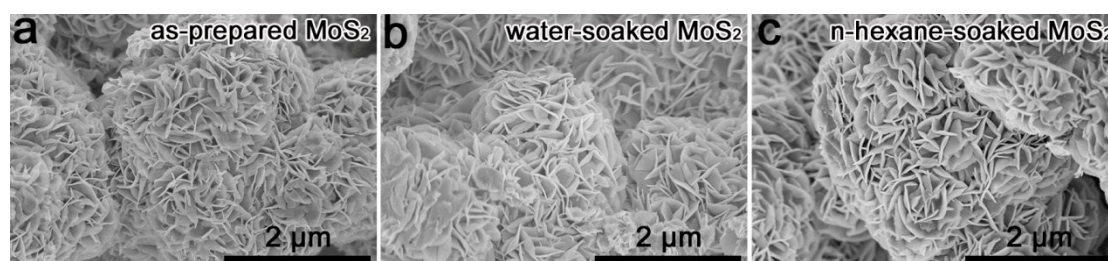

**Figure S10.** SEM images of a) as-prepared MoS<sub>2</sub>, b) water-soaked MoS<sub>2</sub>, and c) n-hexane-soaked MoS<sub>2</sub>.
